# Supplementary material for: A catalogue of novel bovine long noncoding RNA across 18 tissues
Source: PubMed Central journal article supplement (PMC4619662; doi:10.1371/journal.pone.0141225), 2015-10-23

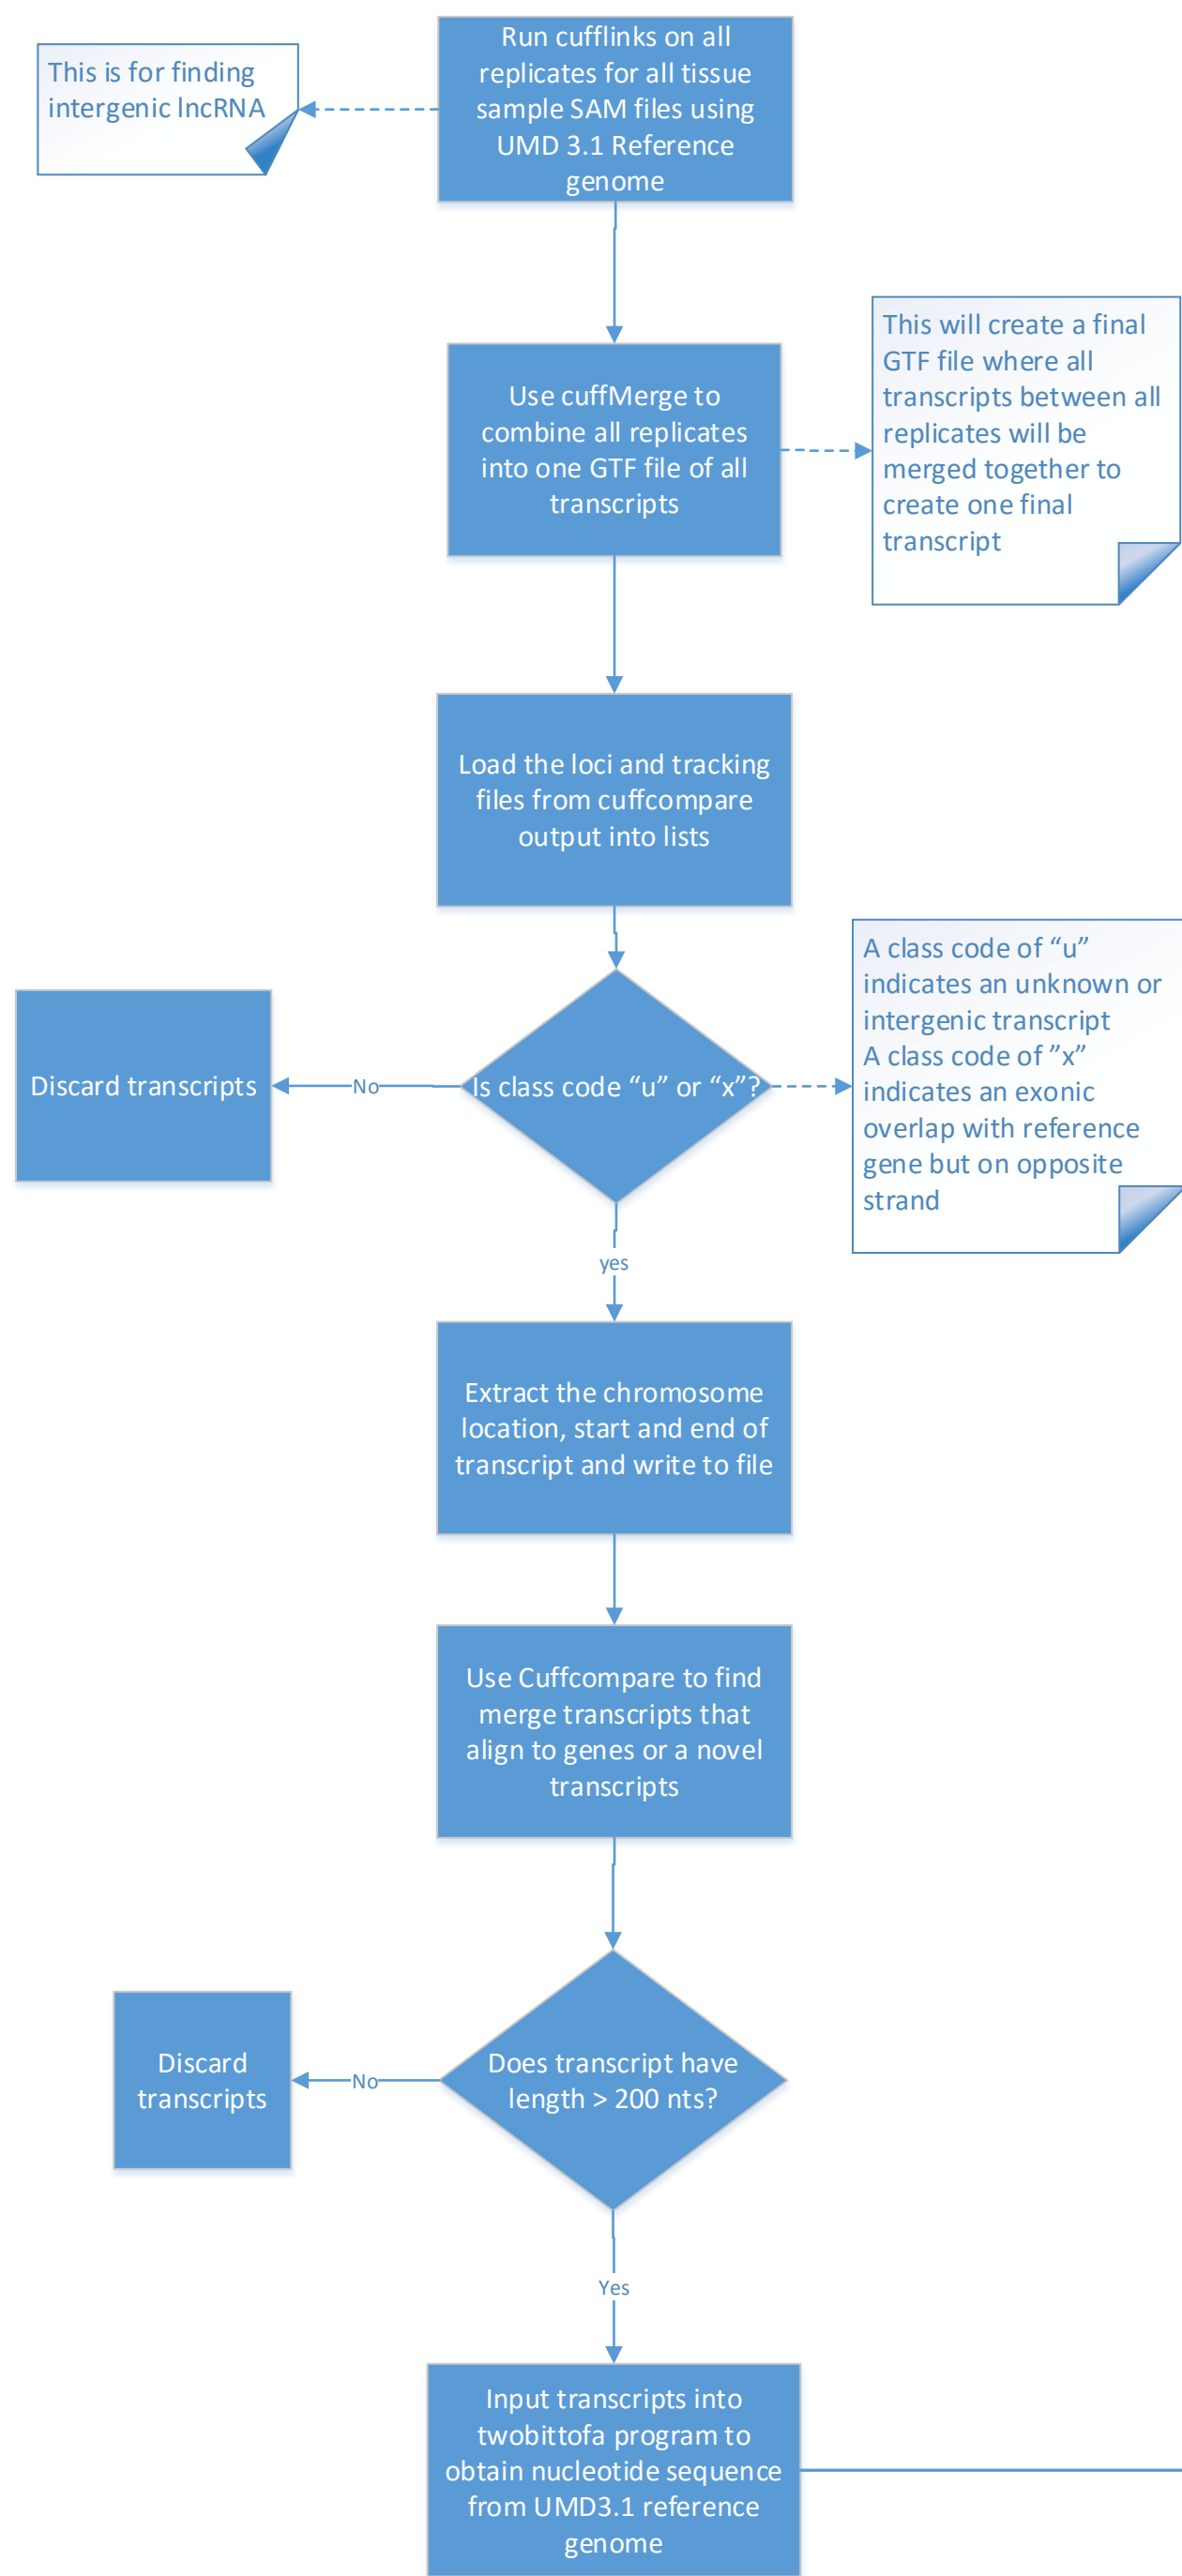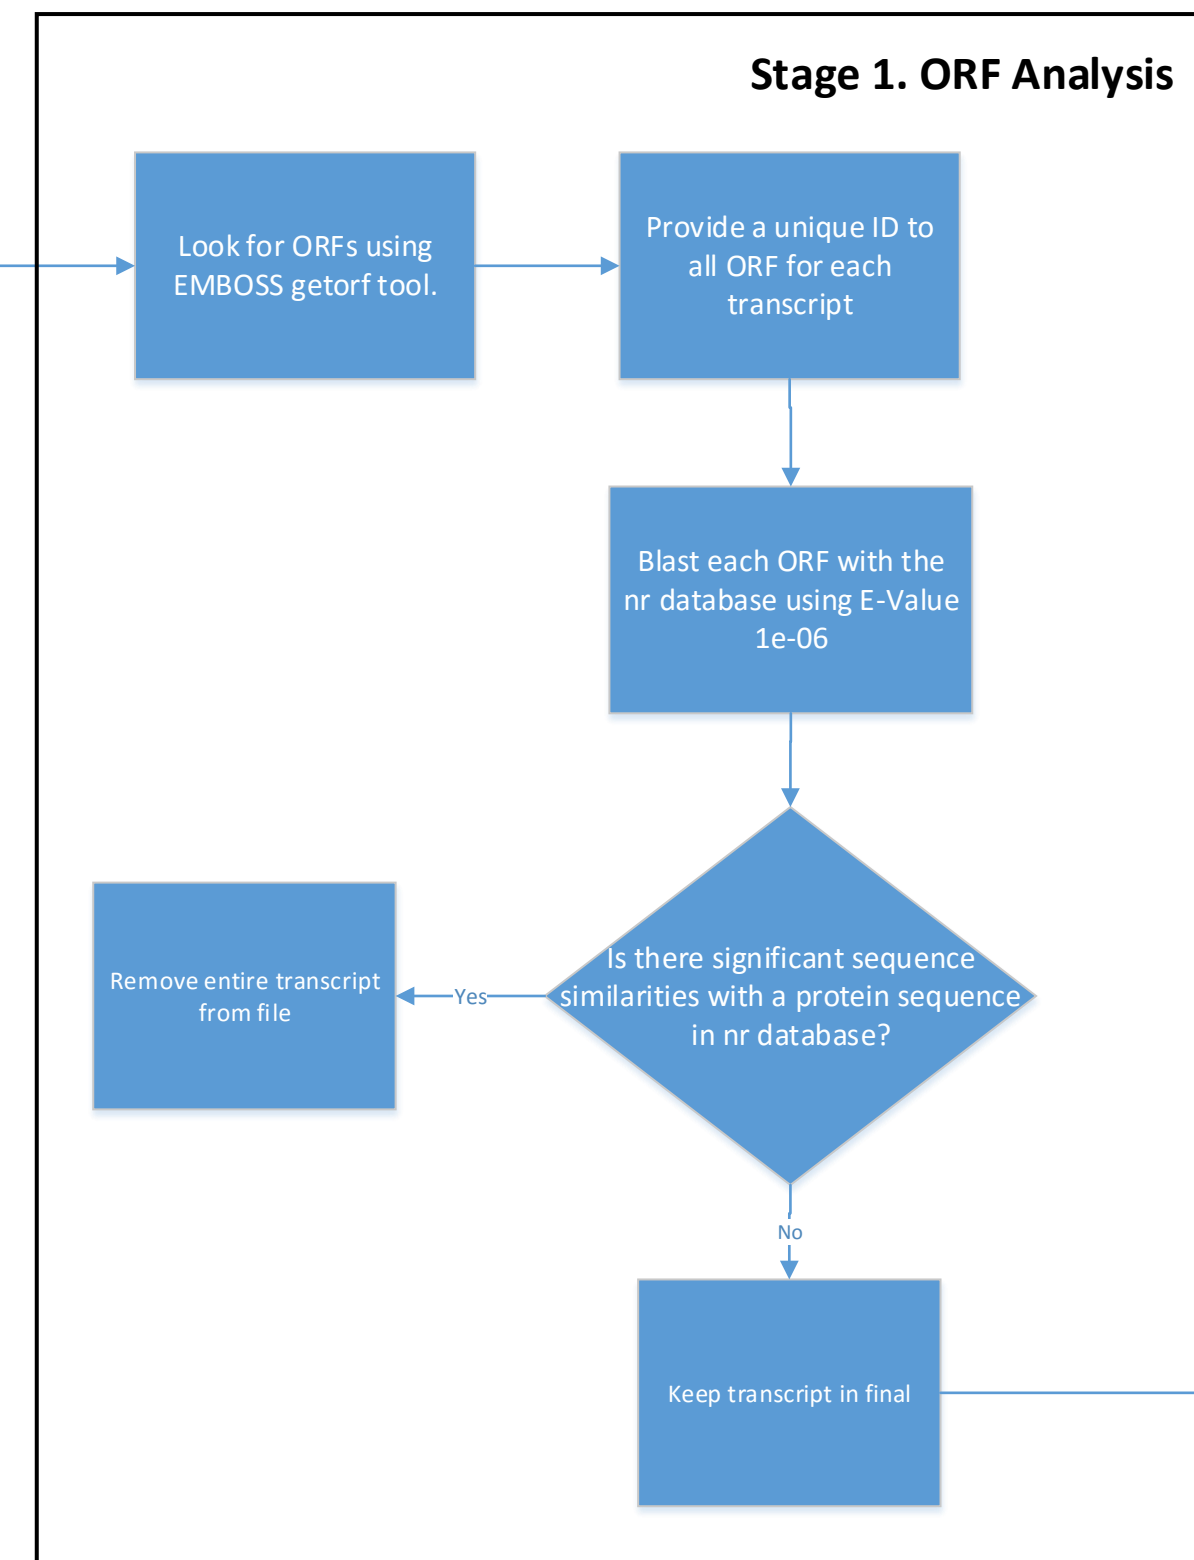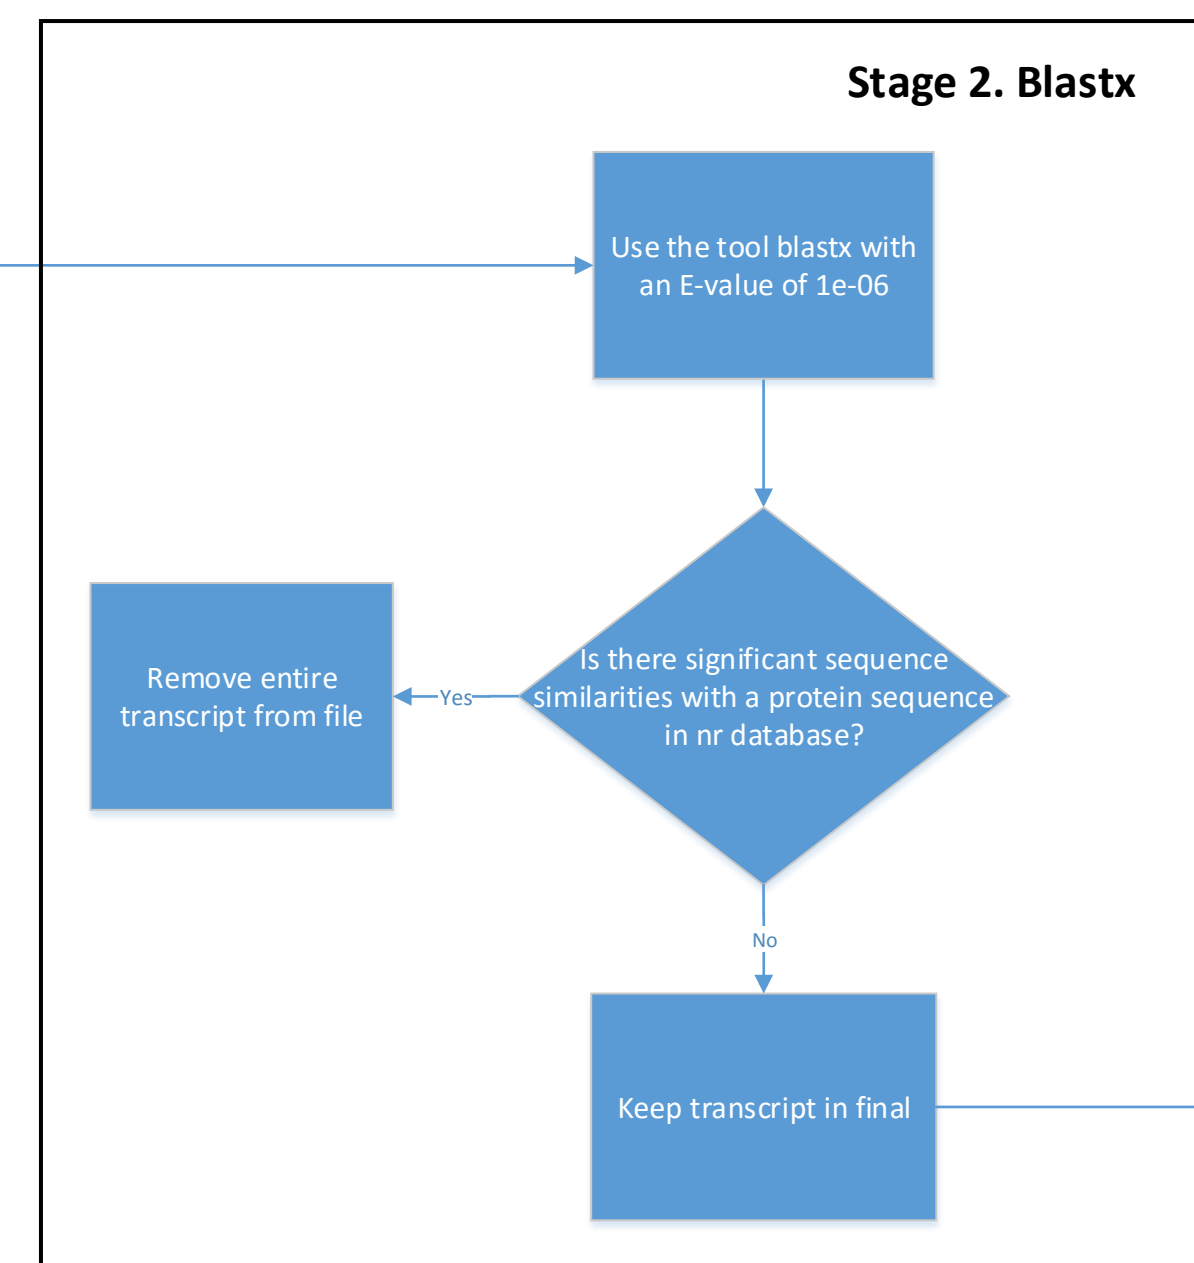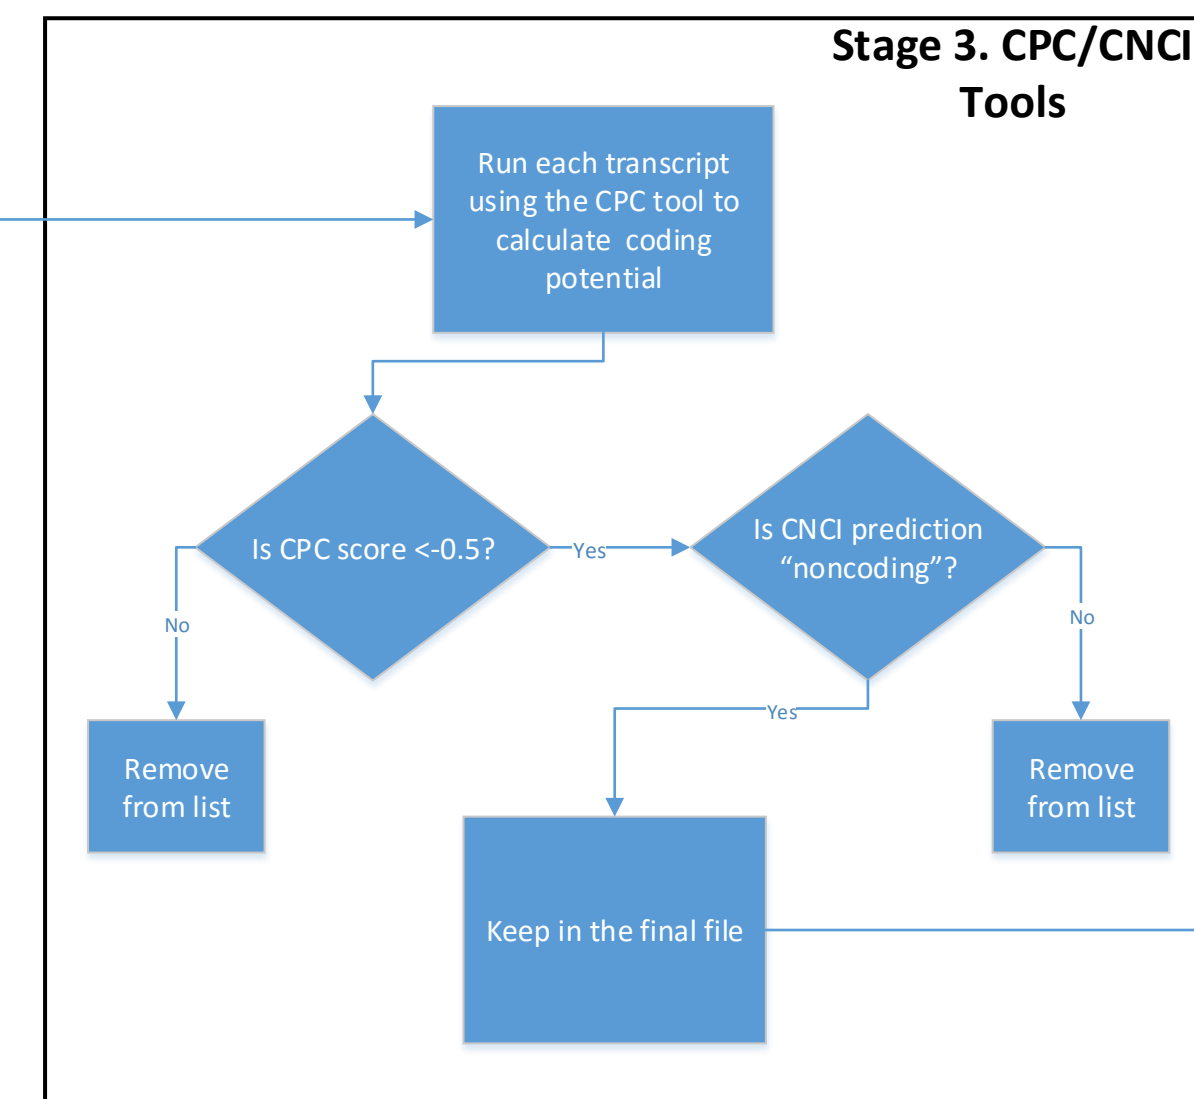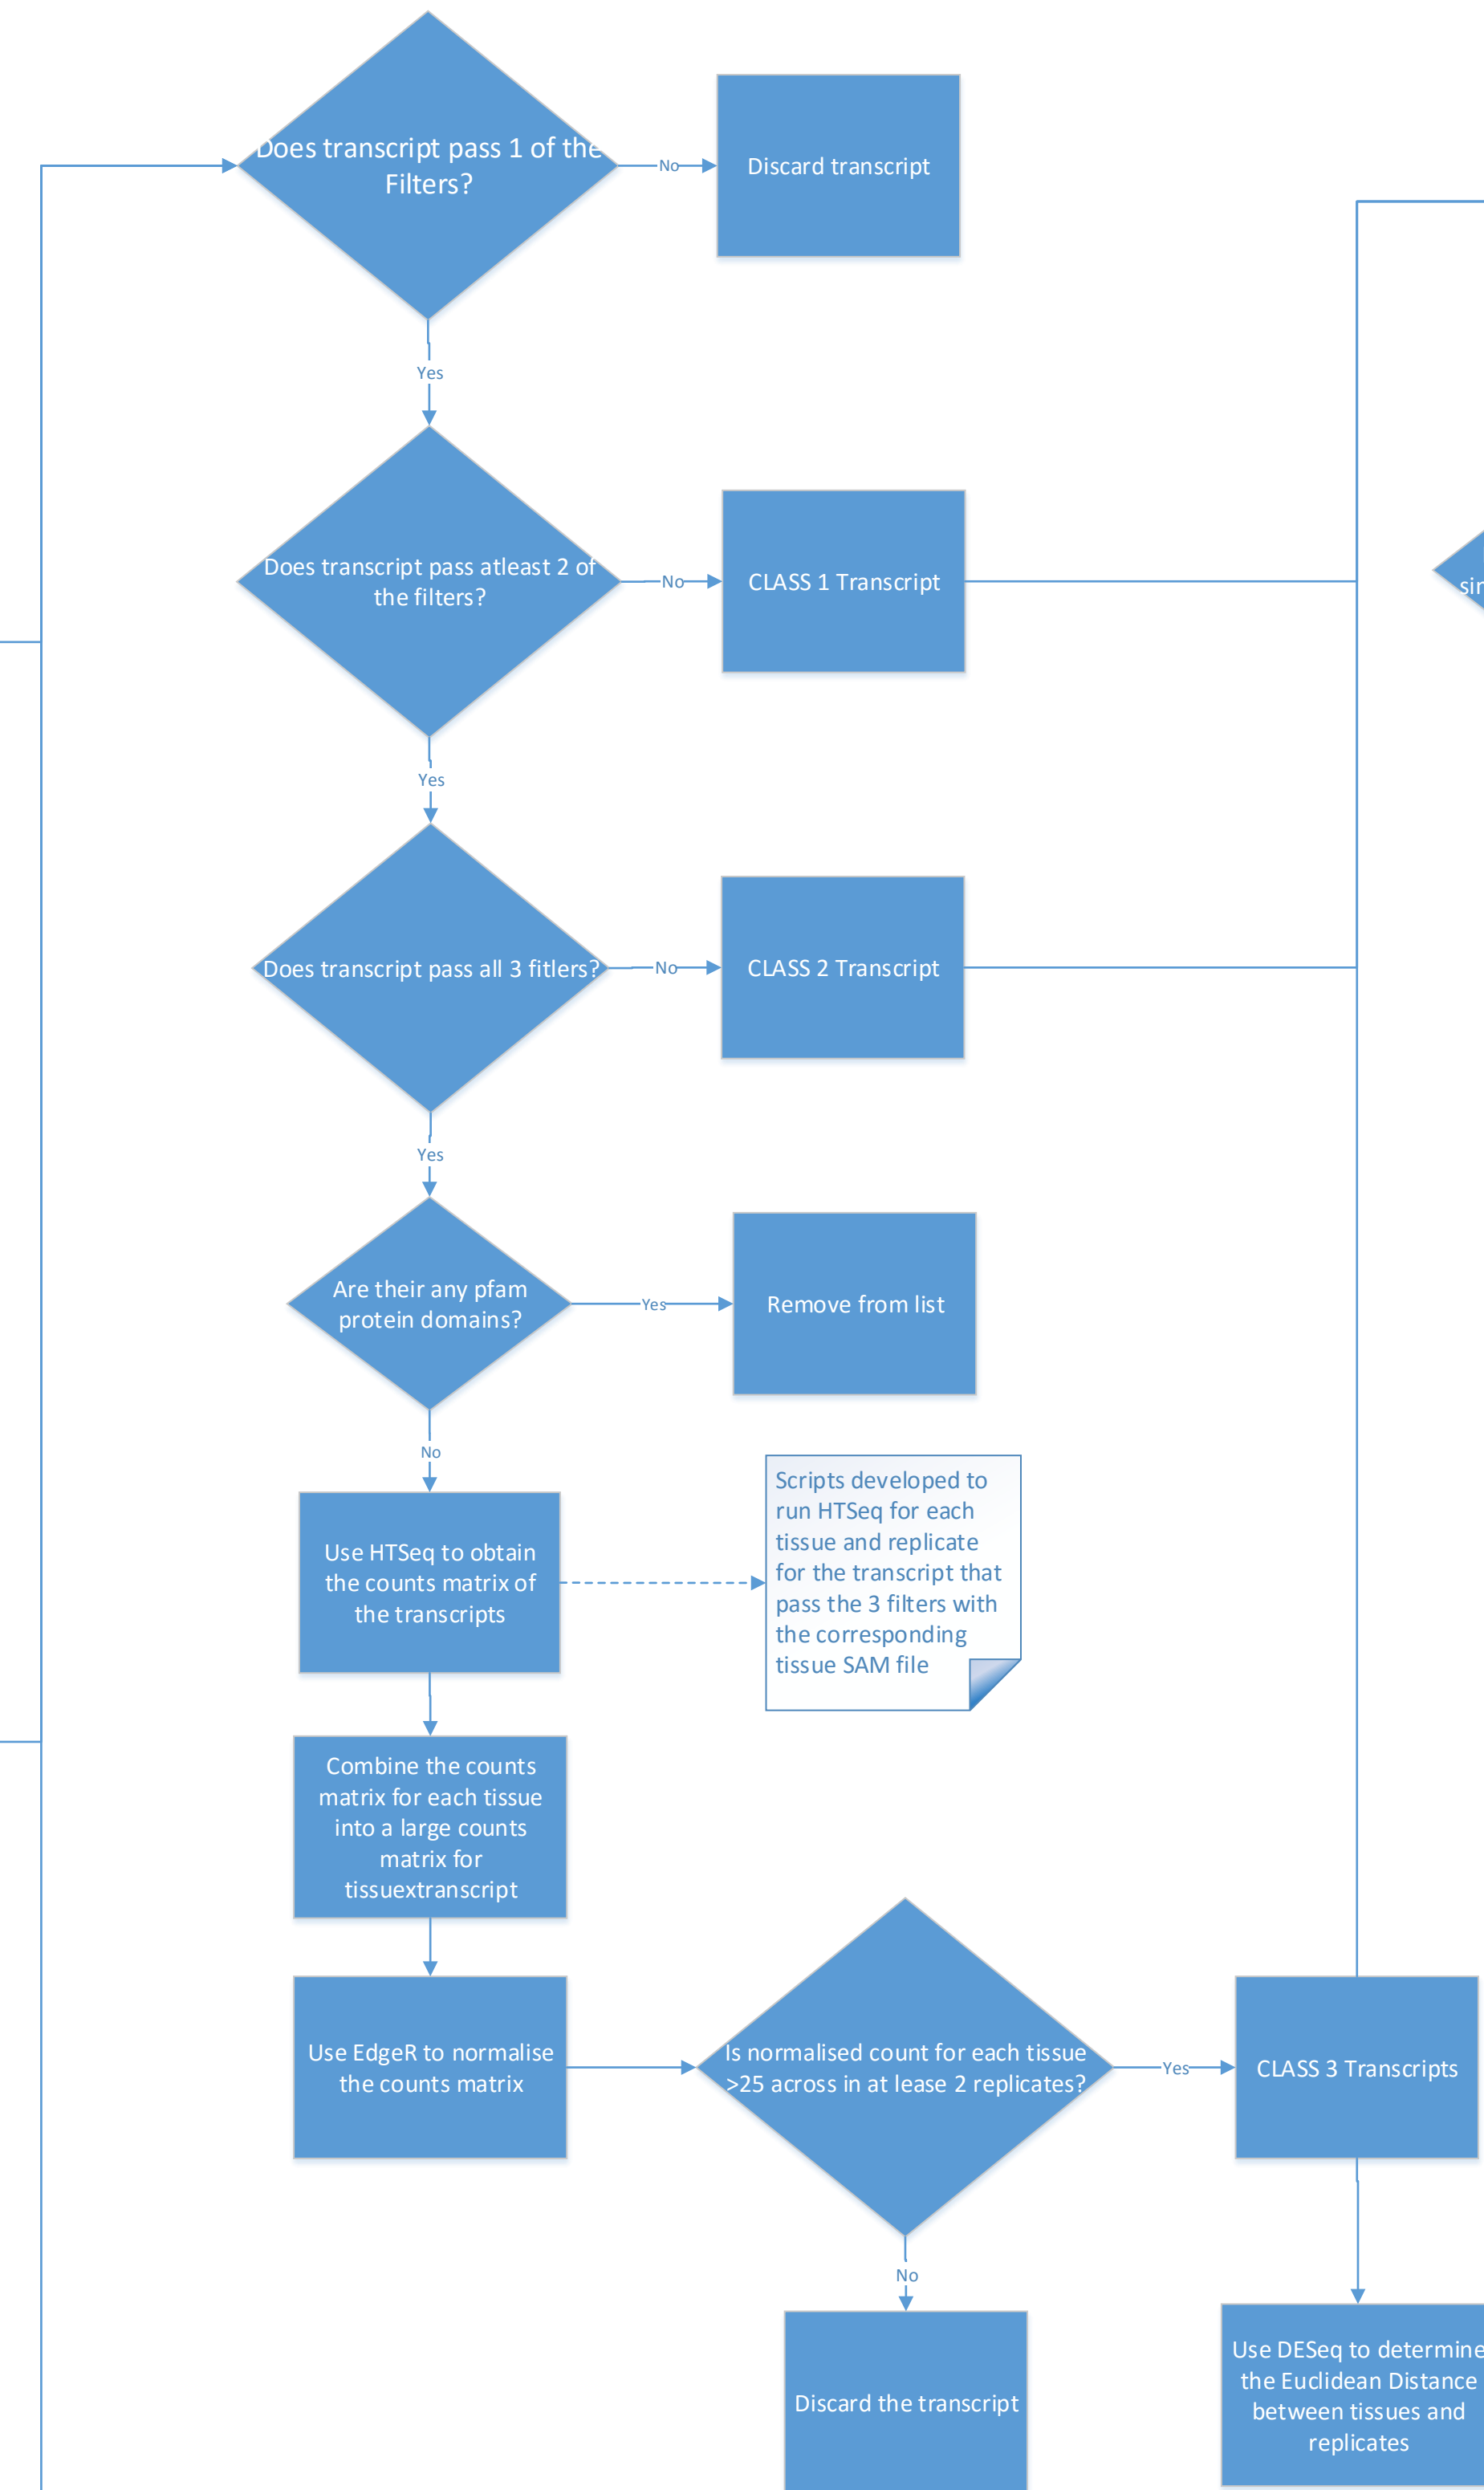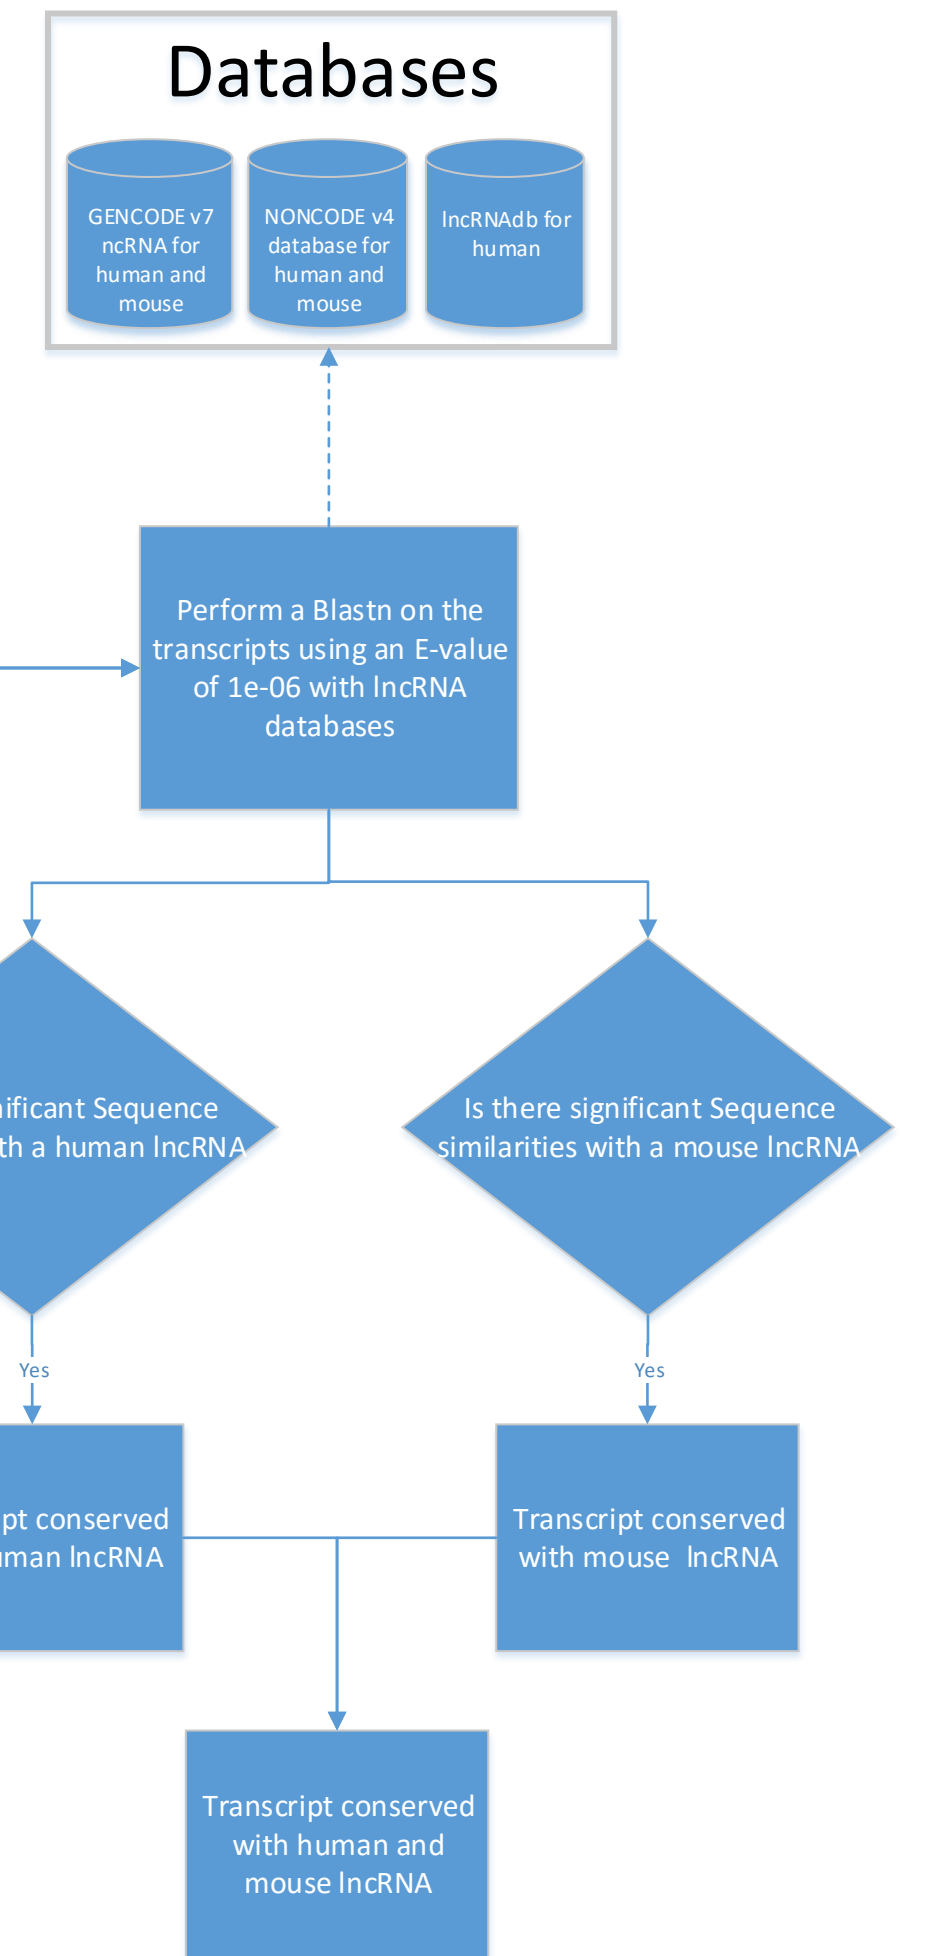

Supplement: pone.0141225.s001.pdf [file pone.0141225.s001.pdf]
